# Supplementary material for: Antisense Oligonucleotides Used to Target the DUX4 mRNA as Therapeutic Approaches in FaciosScapuloHumeral Muscular Dystrophy (FSHD)
Source: Genes (Basel). 2017 Mar 3;8(3):93. doi: 10.3390/genes8030093 (PMC5368697; doi:10.3390/genes8030093)
Supplement: Supplementary file 1 [file genes-08-00093-s001.docx]

**Supplemental data**

**
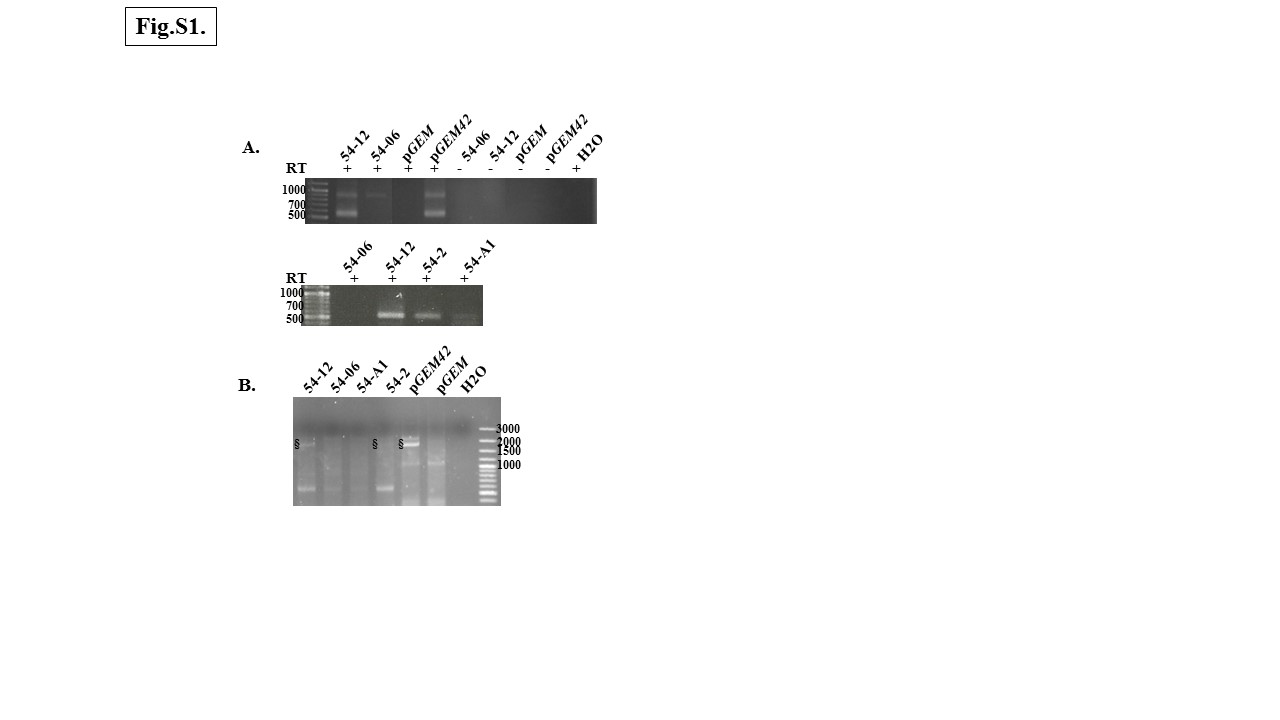
**

**Figure S1.** Detection of the *DUX4* mRNAs in immortalized myoblast clones (FSHD1 and control) derived from a mosaic individual. The cells were grown and differentiated for 5 days as described [67], and total RNA was extracted. (**A**) Reverse transcription (RT) was performed on 1 µg of DNase-treated total RNA with the 3′adaptator of the RLM-RACE kit (Ambion); 3 µl of the resulting cDNA were amplified by nested PCR (for details, see [27]). The 3’RACE products were analyzed by electrophoresis on a 1.5% agarose gel. The different products (400 bp; 550 bp and 900 bp) were sequenced and corresponded to the *DUX4* mRNAs with both introns spliced out, intron II spliced out and the unspliced mRNA, respectively. As RT-PCR controls we used total RNA from C2C12 mouse myoblasts transfected with the *pGEM* plasmid either without insert (negative control) or with a genomic fragment containing 2 D4Z4 units (*pGEM42*; [18]). The experiment was done in the presence (RT+) or absence (RT-) of retrotranscriptase to demonstrate the products did not result from amplification of contaminating genomic DNA. H2O: RT-PCR was performed with no RNA template. Clones 54-12, and 54-2 carry the FSHD1 genetic defect; clones 54-A1 and 54-6 have a normal size D4Z4 array (controls); (**B**) 2 µg of total RNA from (A) were reverse transcribed with a DUX4-specific primer and the resulting cDNA amplified by PCR as described [19]. The 1.7-kb product (§) was sequenced and corresponded to the *DUX4* mRNAs with intron II spliced out.


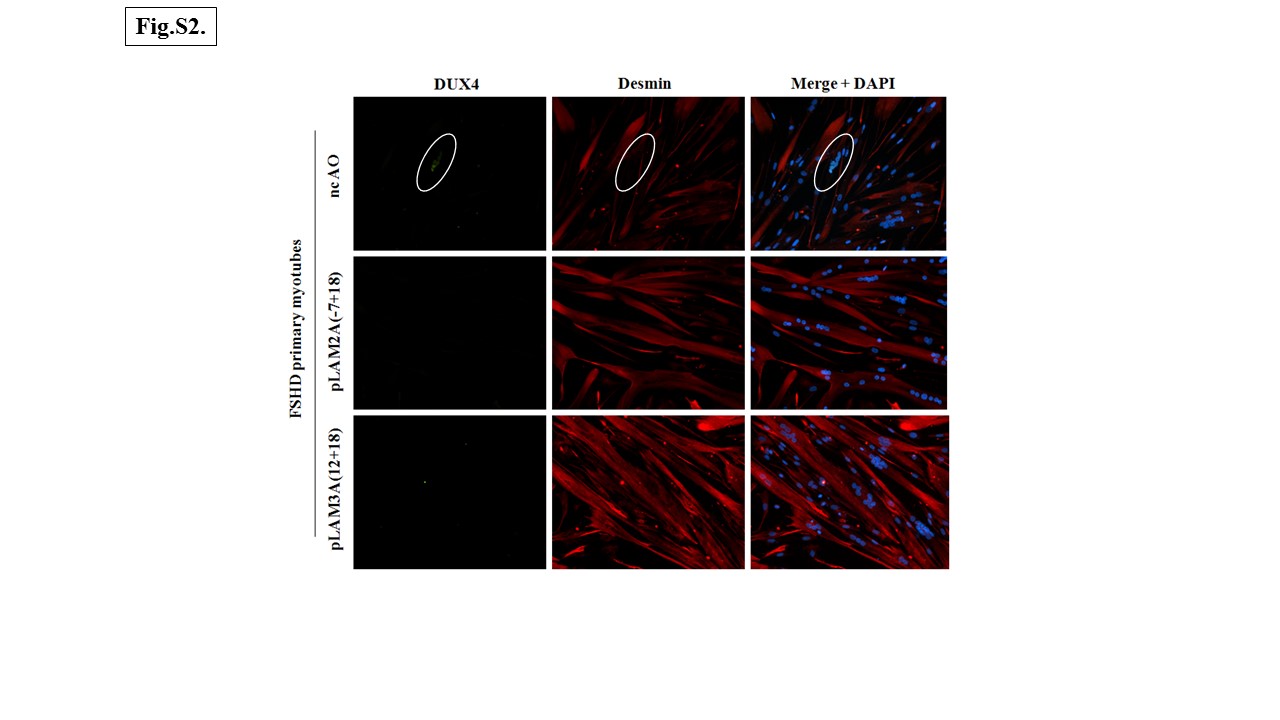


**Figure S2.** Antisense oligonucleotides against *DUX4* mRNA decreased the number of DUX4-positive nuclei in primary FSHD myoblasts and prevented the development of the atrophic myotube phenotype.105 primary FSHD myoblasts were seeded in 35 mm culture dishes. The next day, cells were transfected as described in Fig.3 with either the negative control AO (nc-AO, 600 nM) or the indicated AOs targeting the *DUX4* mRNA at optimized concentrations [27]. Differentiation was induced 4 hours after transfection. Eight days later cells were fixed in 4% PAF and incubated with 9A12 MAb directed against DUX4 (green) or anti-desmin (red) antibody (to confirm differentiation) and appropriate secondary antibodies coupled to Alexa Fluor dyes. The nuclei were labeled with DAPI and very few of them are DUX4-positive as expected [20, 80]. Based on desmin staining, the FSHD myotubes seemed larger following transfection with the AO against DUX4 than the nc-AO. Indeed the few DUX4-positive nuclei (circle, ncAO) are clustered in a very thin myotube similar to those where DUX4 causes cell death as observed by [34]. Such a difference also appeared on Figure 3 that corresponds to a representative field. This observation is in keeping with the inhibitory role of DUX4 in myoblast differentiation that would be suppressed with the *DUX4*-specific AO [25,28,32].
